# Supplementary material for: In-depth comparison of somatic point mutation callers based on different tumor next-generation sequencing depth data
Source: PubMed Central journal article supplement (PMC5118795; doi:10.1038/srep36540), 2016-11-22

# In-depth comparison of somatic point mutation callers based on different tumor next-generation sequencing depth data

Lei Cai<sup>1,4\*</sup>, Wei Yuan<sup>1</sup>, Zhou Zhang<sup>1,2</sup>, Lin He<sup>1,3</sup>, Kuo-Chen Chou<sup>4,5</sup>

1. Bio-X Institutes, Key Laboratory for the Genetics of Developmental and Neuropsychiatric Disorders (Ministry of Education), Shanghai Key Laboratory of Psychotic Disorders (No.13dz2260500), Shanghai Jiao Tong University, Shanghai 200030, China.

2. Institute of Biliary Tract Disease, Xinhua Hospital, Affiliated to Shanghai Jiao Tong University School of Medicine, Shanghai 200092, China.

3. Women's Hospital School of Medicine Zhejiang University, Hangzhou 310006, China.

4. Gordon Life Science Institute, Boston, Massachusetts 02478, United States of America.

5. Center of Excellence in Genomic Medicine Research (CEGMR), King Abdulaziz University, Jeddah 21589, Saudi Arabia.

## Supplementary Information

**Table S1.** Sequencing summary of WES and targeted sequencing

| Items                   | WES               | Targeted sequencing |
|-------------------------|-------------------|---------------------|
| Sample number           | 32*2              | 54*2                |
| Reads passed filtration | 71064825±14074367 | 12972646±2980762    |
| Reads mapped (%)*       | 98.5 (97.4-99.6)  | 99.7 (99.6-99.7)    |
| Capture efficiency (%)* | 59.6 (57.9-61.3)  | 62.2 (59.2-65.4)    |
| Mean depth              | 50.4±10.2         | 366.2±79.2          |
| ≥ 1 coverage (%)*       | 95.9 (95.4-96.2)  | 98.7 (98.6-98.8)    |
| ≥ 4 coverage (%)*       | 93.4 (92.1-94.0)  | N/A                 |
| ≥ 8 coverage (%)*       | 91.0 (89.2-91.7)  | N/A                 |
| ≥10 coverage (%)*       | N/A               | 96.4 (95.5-96.9)    |
| ≥20 coverage (%)*       | 80.7 (77.9-83.0)  | N/A                 |
| ≥50 coverage (%)*       | N/A               | 67.8 (64.9-72.3)    |
| ≥200 coverage (%)*      | N/A               | 89.5 (85.8-91.2)    |

\*Data are presented as mean±sd or median(0.25-0.75quartile)

**Table S2.** Enrichment of SNVs calls with more than twice observations in controls with dbSNP database

| Item      | WES                                         |                                          | Target sequencing                           |                                           |
|-----------|---------------------------------------------|------------------------------------------|---------------------------------------------|-------------------------------------------|
|           | Calls with $\leq 2$ observation in controls | Calls with $> 2$ observation in controls | Calls with $\leq 2$ observation in controls | Calls with $> 2$ observations in controls |
| dbSNP     | 7940                                        | 3069                                     | 1948                                        | 557                                       |
| non-dbSNP | 9213                                        | 1830                                     | 1852                                        | 285                                       |

**Table S3.** Algorithm tools for sSNVs detection within NGS data

| Tools         | Version | URL                                                                                                                                                                                                                                                   | Remark                                      | Release date |
|---------------|---------|-------------------------------------------------------------------------------------------------------------------------------------------------------------------------------------------------------------------------------------------------------|---------------------------------------------|--------------|
| MuTect2       | 2.0     | <a href="https://software.broadinstitute.org/gatk/guide/tooldocs/org_broadinstitute_gatk_tools_walkers_cancer_m2_MuTect2.php">https://software.broadinstitute.org/gatk/guide/tooldocs/org_broadinstitute_gatk_tools_walkers_cancer_m2_MuTect2.php</a> | Sensitive detection of low allelic-fraction | Nov. 2015    |
| SomaticSniper | 1.0.5.0 | <a href="http://gmt.genome.wustl.edu/2015/07/16/somatic-sniper_v1.0.5.0_released.html">http://gmt.genome.wustl.edu/2015/07/16/somatic-sniper_v1.0.5.0_released.html</a>                                                                               | High computational efficiency               | Jul. 2015    |
| Strelka       | 1.0.14  | <a href="ftp://ftp.illumina.com/v1-branch/v1.0.14/">ftp://ftp.illumina.com/v1-branch/v1.0.14/</a>                                                                                                                                                     | Clean outputs through stringent filtering   | Jul. 2014    |
| VarScan       | 2.4.0   | <a href="http://dkoboldt.github.io/varscan/">http://dkoboldt.github.io/varscan/</a>                                                                                                                                                                   | Sensitive detection of high-quality sSNVs   | Aug. 2015    |
| MuTect2       | 2.0     | <a href="https://software.broadinstitute.org/gatk/guide/tooldocs/org_broadinstitute_gatk_tools_walkers_cancer_m2_MuTect2.php">https://software.broadinstitute.org/gatk/guide/tooldocs/org_broadinstitute_gatk_tools_walkers_cancer_m2_MuTect2.php</a> | Sensitive detection of low allelic-fraction | Nov. 2015    |

**Figure S1. Mutations detected by each caller based on WES (A) and UDT-Seq (B) data.** Mutations are classified by the number of callers detection.

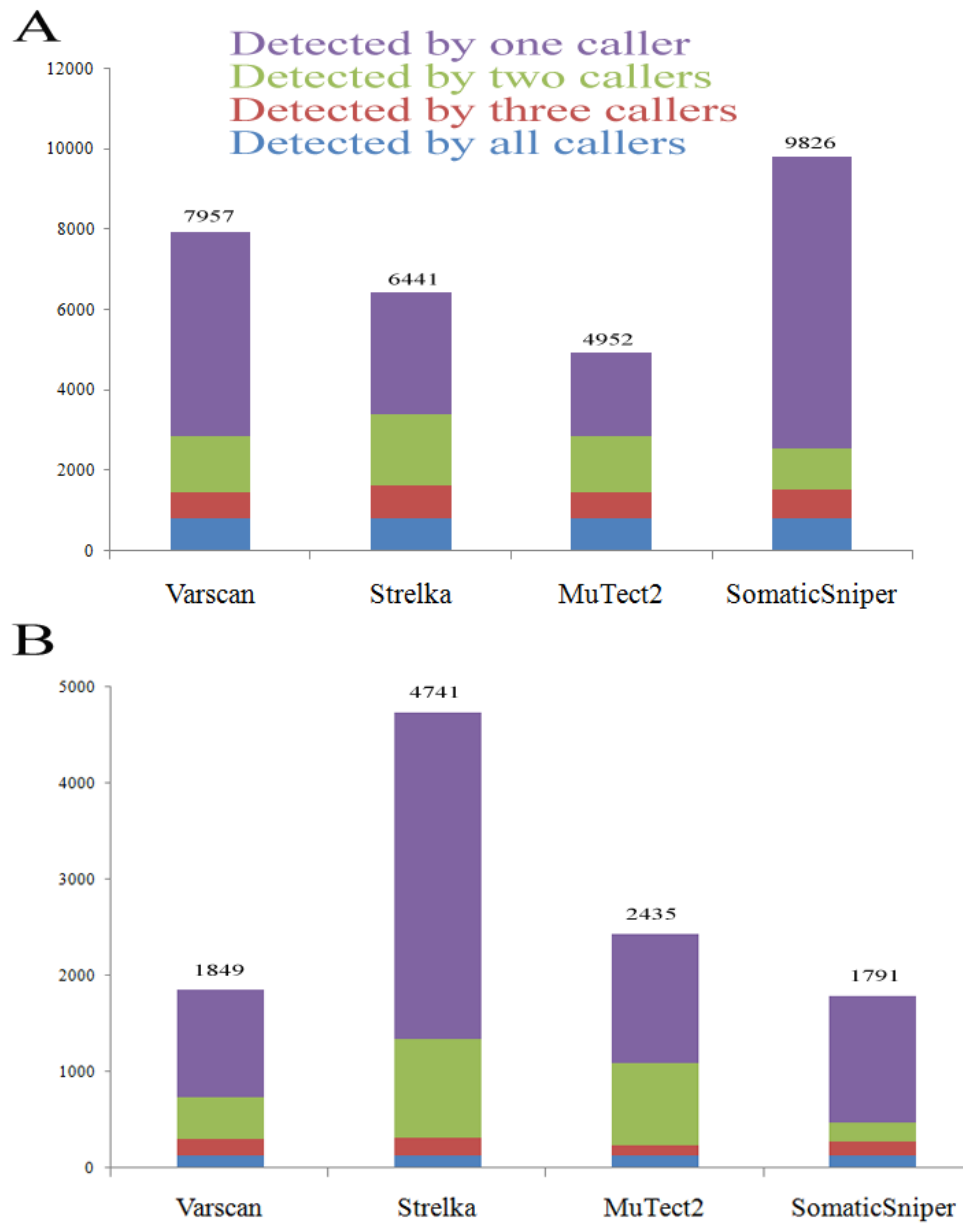

**Figure S2. Somatic mutation candidates found in COSMIC and dbSNP database.**  
A: WES, B: UDT-Seq. Variants present in both databases are classified into COSMIC ones.

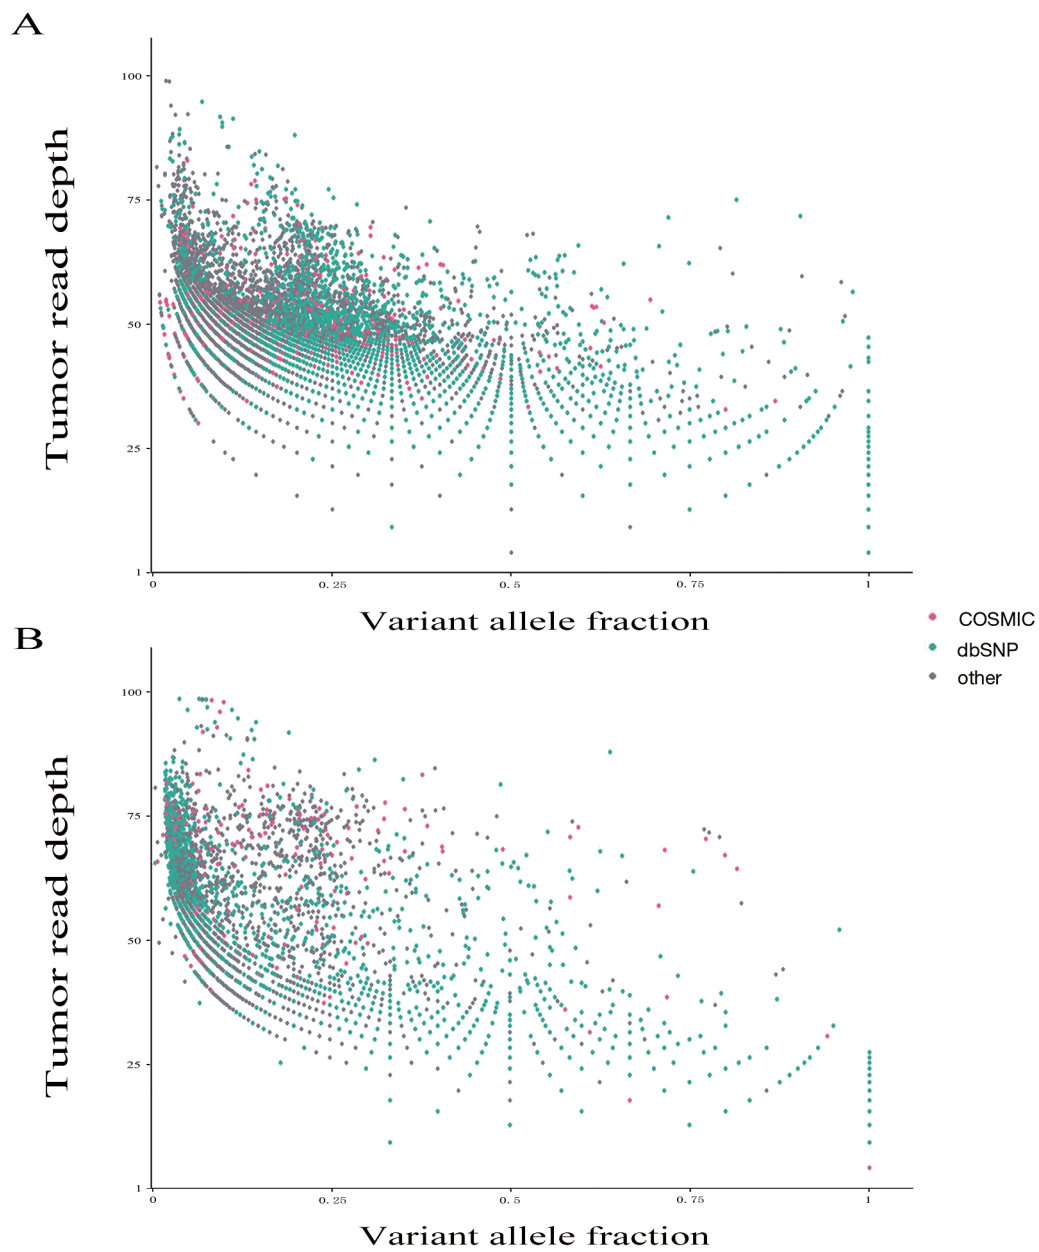

**Figure S3. Candidates detected by Cake.** A: WES; B: UDT-Seq. Only Cake calls that overlap with the collection of candidates by the four callers were shown in the figure.

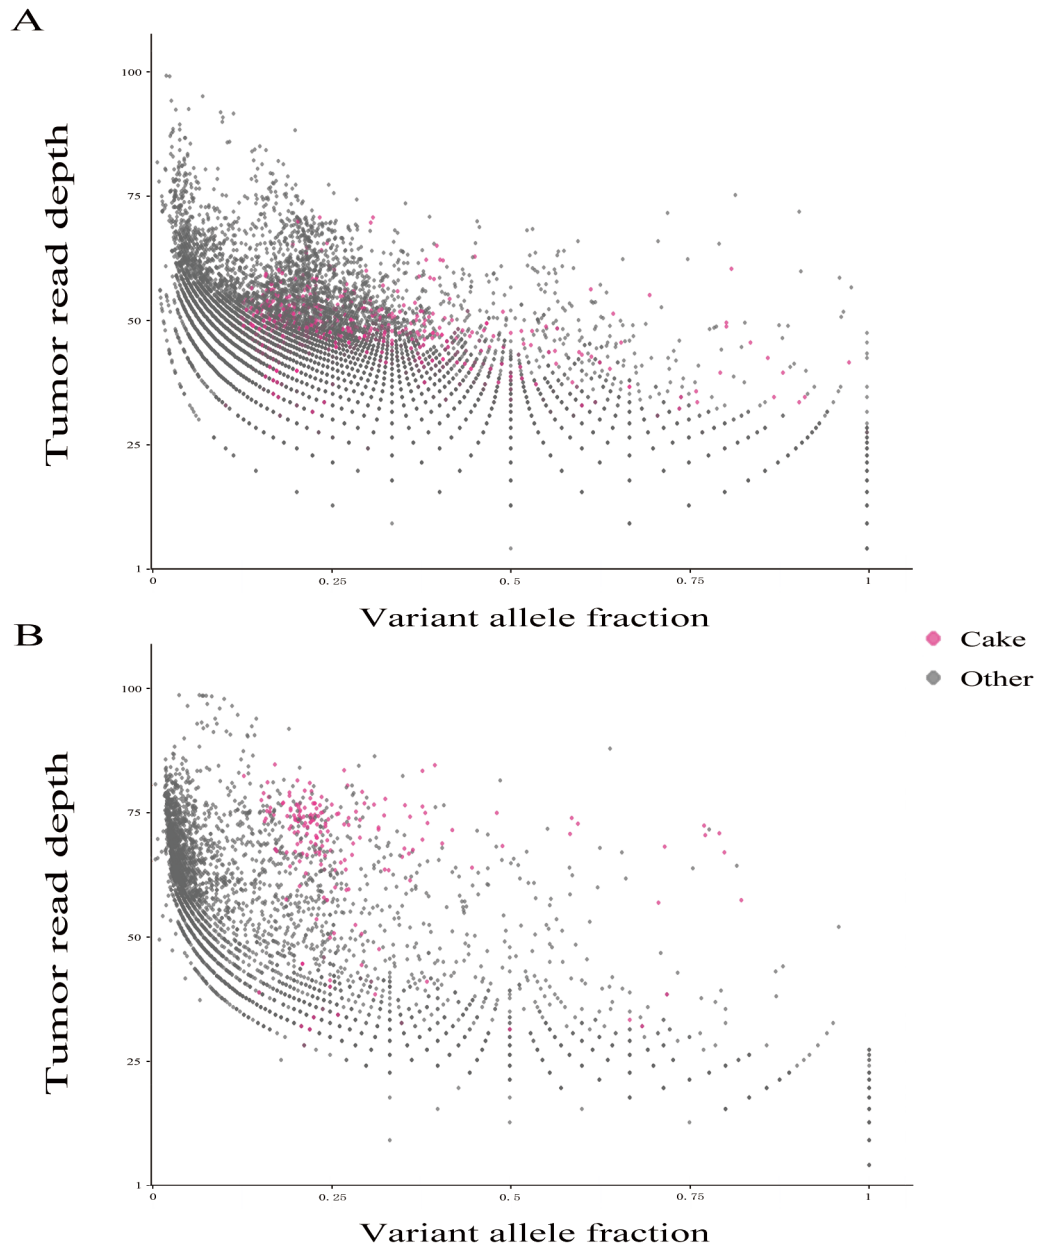

Supplement: srep36540-s1.pdf [file srep36540-s1.pdf]
